# Supplementary material for: Retarded sodium alloying interface reaction for stable anode-less sodium metal batteries
Source: Royal Society of Chemistry journal article supplement (doi:10.1039/d4cc02545h), 2024-01-01
Supplement: d4cc02545h1.pdf [file d4cc02545h1.pdf]

## **Retarded sodium alloying interface reaction for stable anode-less sodium metal batteries**

Hao Wu, <sup>#a</sup> Chunlin Xie, <sup>#a</sup> Mingze Zhang, <sup>a</sup> Jiapeng Zou, <sup>a</sup> Runxin Feng, <sup>a</sup> Hongqin Lu, <sup>a</sup> Qi Zhang, <sup>a</sup> Yougen Tang, <sup>a</sup> Haiyan Wang <sup>a\*</sup>

<sup>a</sup> Hunan Provincial Key Laboratory of Chemical Power Sources

College of Chemistry and Chemical Engineering

Central South University

Changsha, 410083, P.R. China

# These authors contributed equally to this work.

E-mail: [wanghy419@csu.edu.cn](mailto:wanghy419@csu.edu.cn)

## Methods

### Material preparation.

The sodium discs of 12 mm diameter, glass fibre (Whatman GF/A) and Celgard C200 membrane were purchased from Canrd Technology Co. Ltd. Single-sided carbon coated aluminium foil (Al@C foil) purchased from Jinghong New Energy Co. The electrolyte was obtained by dissolving 1 M NaPF<sub>6</sub> (DoDoChem, battery grade) in diglyme (DoDoChem, battery grade). The carbon-coated Na<sub>3</sub>V<sub>2</sub>(PO<sub>4</sub>)<sub>3</sub> cathode (NVP) was purchased from Shenzhen Kejing Ltd. The composition of the cathode slurry was 90wt% active materials, 5wt% Super P and 5wt% PVDF. The electrode slurries were cast on Al@C foil followed by a drying process under a vacuum. The mass loading of cathode material was about 15~19 mg cm<sup>-2</sup>.

The metal lead and antimony target with a diameter of 10 cm (99.99% purity) were purchased from ONA Targets Ltd. Magnetron sputtering equipment manufactured by TAILONG ELECTRONICS (Sputter-100). A uniform layer of Pb and Sb was sputtered on the Al@C foil by magnetron sputtering with the sputtering parameters of 200W for 3 min (RF power). The vacuum of the chamber before sputtering was about  $1 \times 10^{-5}$  Pa, the flow rate of Ar gas used for sputtering was 100 sccm, and the rotational speed of the base was 10 r/min.

### Characterizations.

Nondestructive-XRD spectra enabling avoidance of air contact were recorded using a Rigaku X-ray diffractometer. The scanning electron microscope (SEM, JSM-7610FPlus) with non-destructive transfer capability was used to characterize the sodium plating and stripping morphology of the substrate. Optical microscopy (AOSVI M203-HD228S) was used to observe the evolution of sodium deposition in glove box. Transmission electron microscopy (TEM, JEOL/JEM-F200) was used to characterize

the crystal structure of the nano-coated layers before and after the alloying reaction. Molybdenum mesh microgrids were coated with Nano-Pb layers using the magnetron sputtering method. The parameters of magnetron sputtering were adjusted to match the process parameters for the preparation of Pb-Al@C, but the sputtering time was shortened to a quarter of the time to meet the requirements for sample thickness in TEM testing. To investigate the structural changes of the coating after sodium plating/stripping, we assembled half-cells for repeated sodium plating/stripping using sputter-coated molybdenum mesh as electrodes. Afterward, a simple solvent cleaning was conducted to coated microgrids before direct utilization for TEM observations. In this work, non-destructive transfer devices were used for SEM, and XRD tests, which adequately preserved the true information of the test samples (the samples were handled in a glove box). The corresponding non-destructive transmission device and the process used are shown below (Figure D1-2):

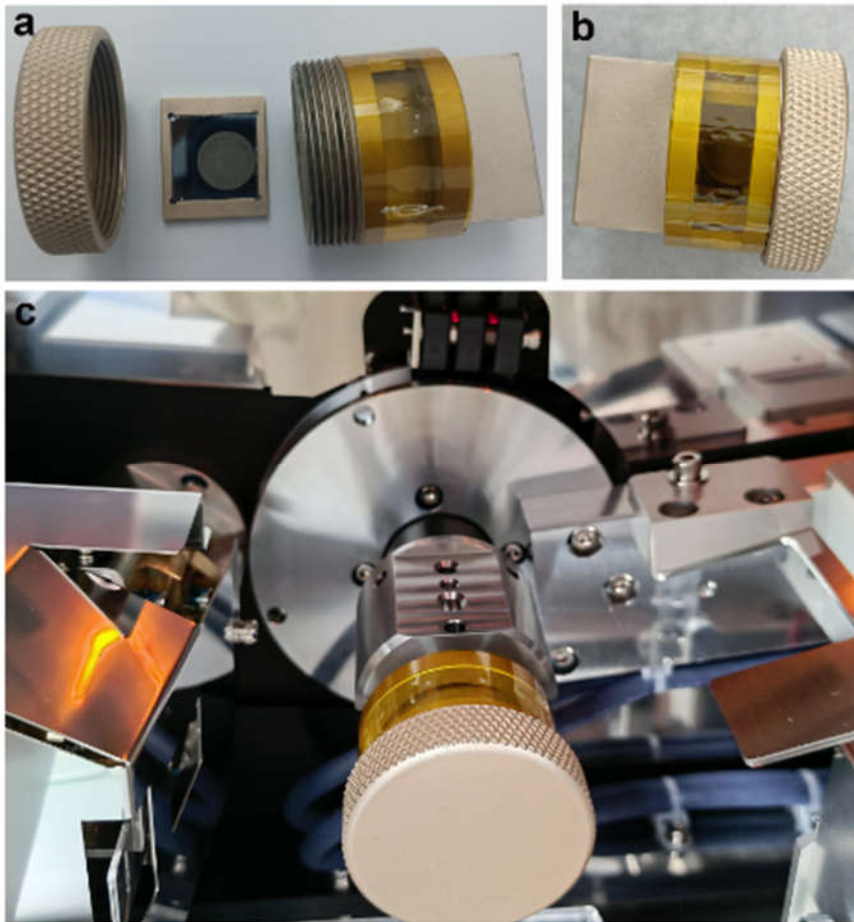

**Figure D1.** Non-destructive transfer devices for XRD.

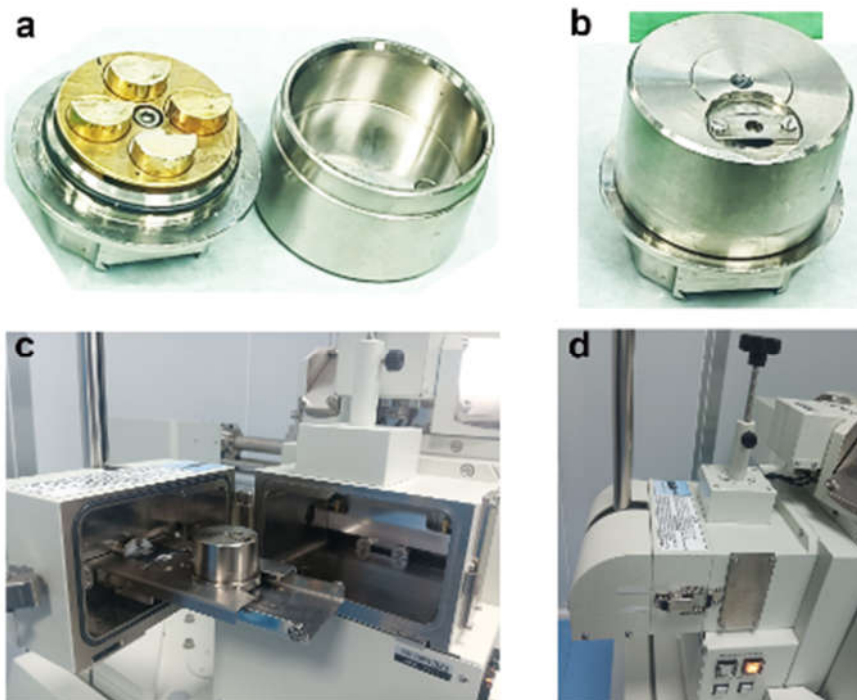

**Figure D2.** Non-destructive transfer devices for SEM.

### **Electrochemical measurements.**

Coin cells (CR2032) were assembled in an argon-filled glove box. The amount of electrolyte used for a coin cell is about 100  $\mu\text{L}$ . Glass fibre (Whatman GF/A) plus Celgard C200 membrane was utilized as the separator. The galvanostatic charge/discharge tests were performed using a Neware MIHW-200-160CH battery testing system. The anode-less sodium metal battery did not perform any pre-treatment such as pre-sodiation before cycling. The charge cut-off voltage of the Na||Al@C (or Pb-Al@C and Sb-Al@C) half-cell was set to 0.5 V (vs Na/Na<sup>+</sup>). The EIS was performed on the AUTOLAB electrochemical workstation with a frequency range of 0.01 Hz ~500 kHz. The EIS of full cell was tested at full charge state (charged to 3.8V).

### **Computational details.**

The first-principles calculations were conducted using generalized gradient approximation (GGA) and Perdew–Burke–Ernzerhof (PBE) exchange-correlation functional in Castep module of Materials Studio of Accelrys Inc. During geometry optimization, the convergence tolerance was set to  $1.0 \times 10^{-5}$  eV per atom for energy,  $3.0 \times 10^{-2}$  eV  $\text{\AA}^{-1}$  for maximum force, and  $1.0 \times 10^{-3}$   $\text{\AA}$  for maximum displacement. The binding energy ( $E_b$ ) of the metal substrate was calculated using a five-layer  $3 \times 3$  supercell and releasable top three-layer atoms, the carbon structure was modelled using a single layer of graphite ( $2 \times 2$  facet) and the corresponding binding energy was calculated according to the following equations:

$$E_b = E_{\text{total}} - E_{\text{sub}} - E_{\text{atom}} \quad (1)$$

$E_{\text{total}}$ ,  $E_{\text{sub}}$ , and  $E_{\text{atom}}$  represent the total energy of the Pb facets (or Sb, C and Al facets) combined with the sodium atom, the energy of Pb facets (or Sb, C and Al facets), and the energy of the sodium atom, respectively.

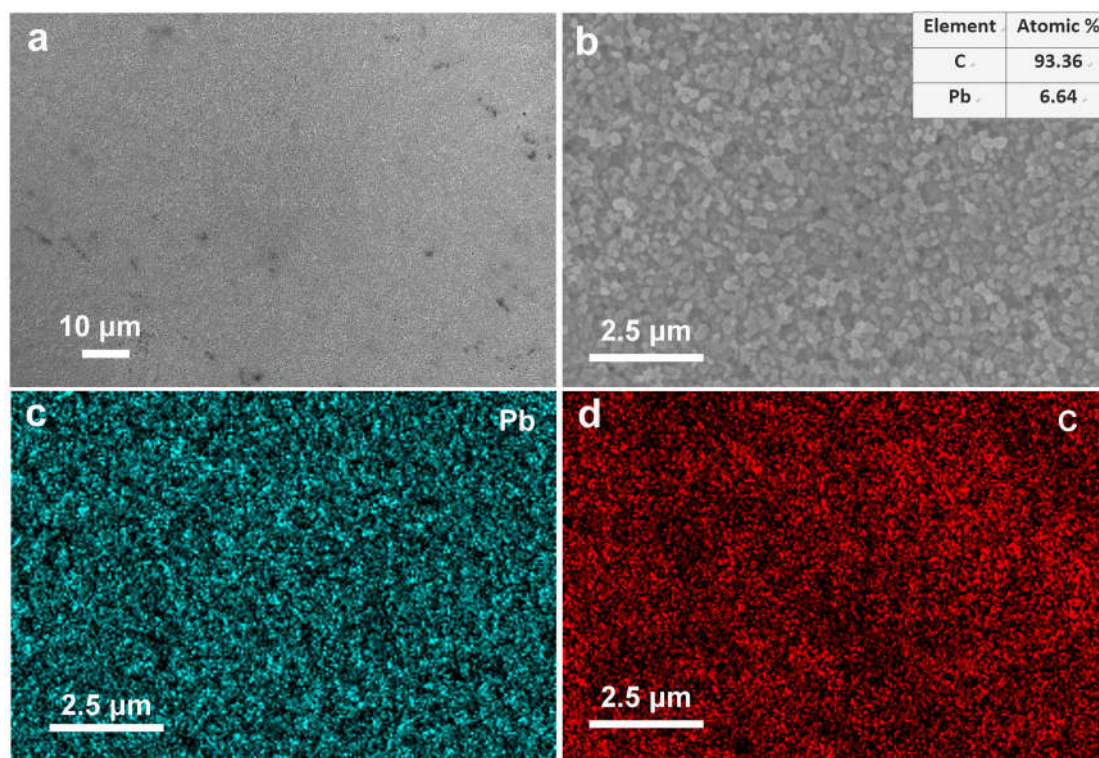

Figure S1. SEM images and corresponding EDS mappings of Pb-Al@C.

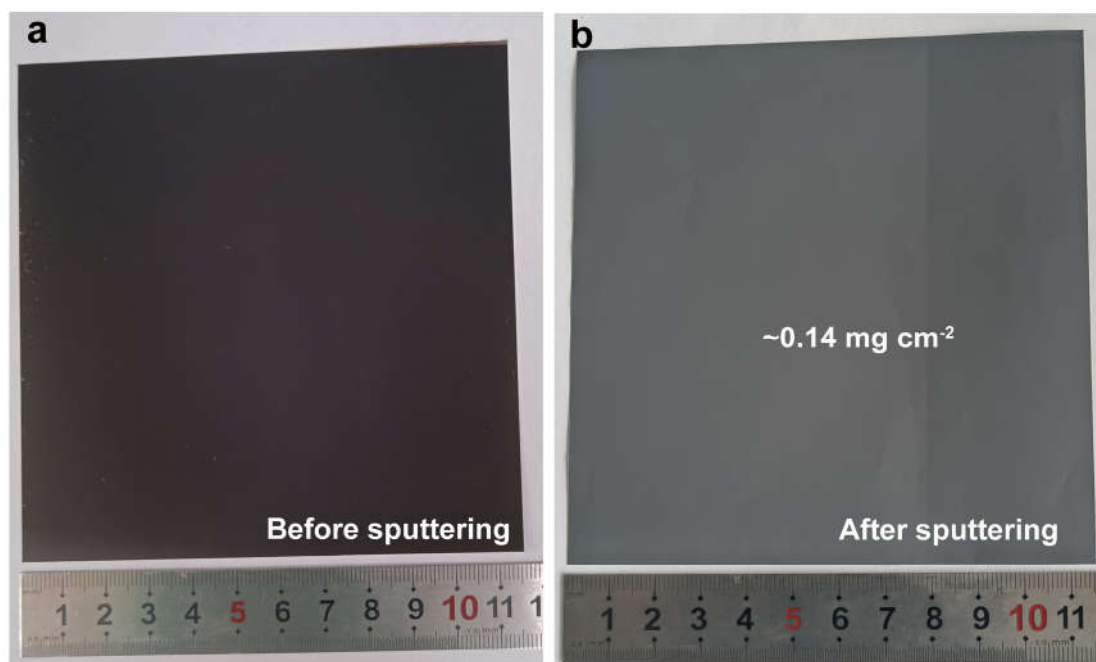

Figure S2. Digital photos of Al@C before and after sputtering of Pb.

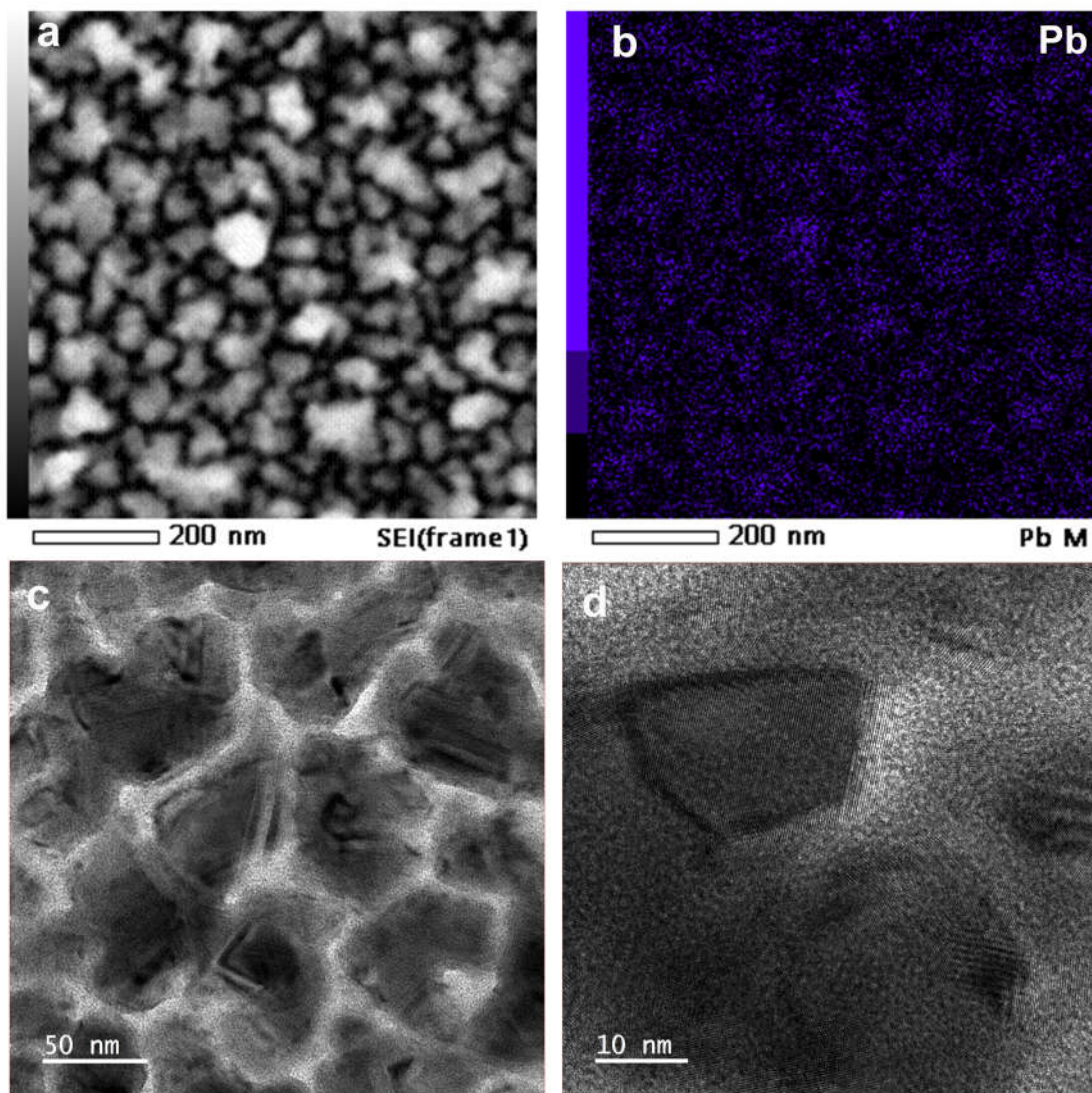

Figure S3. TEM images and corresponding EDS mapping of Pb sputtered on a molybdenum mesh.



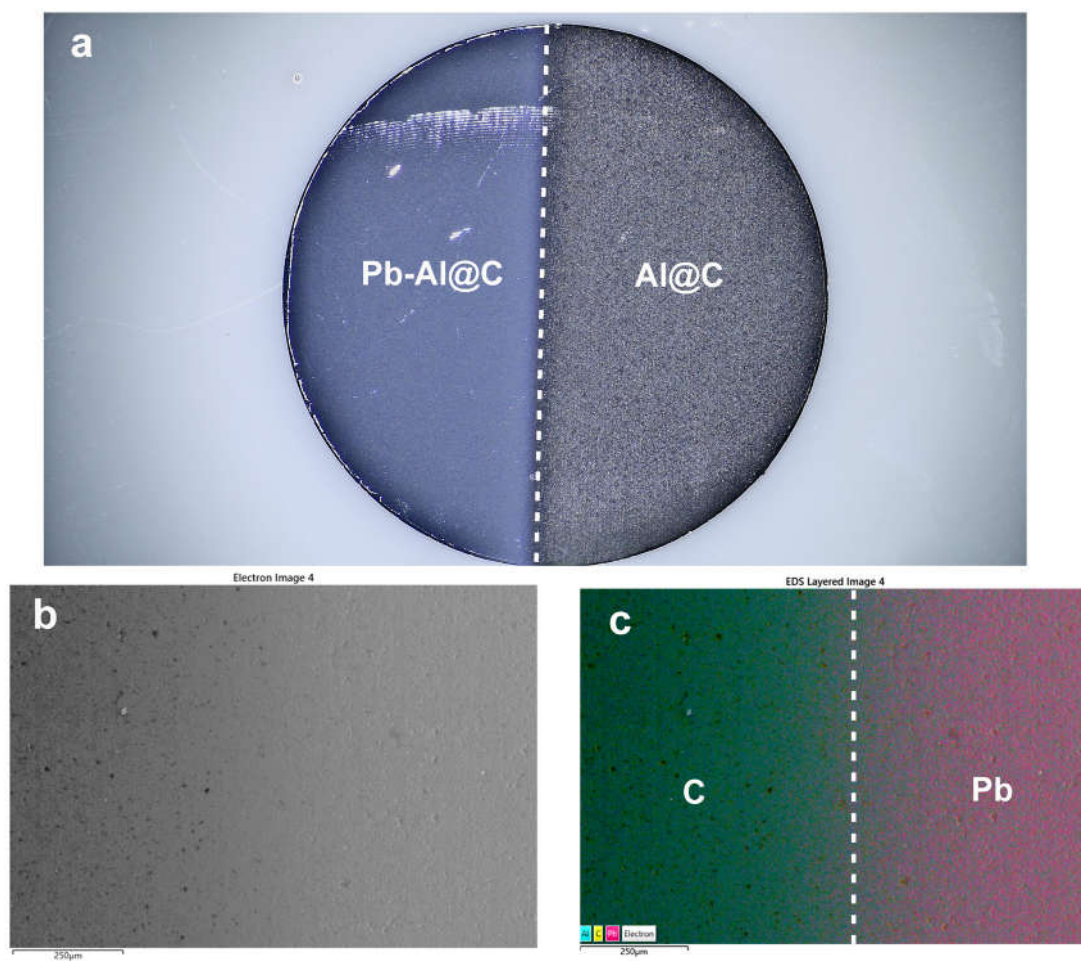

Figure S4. Optical micrographs and EDS mapping of Al@C after selective sputtering.

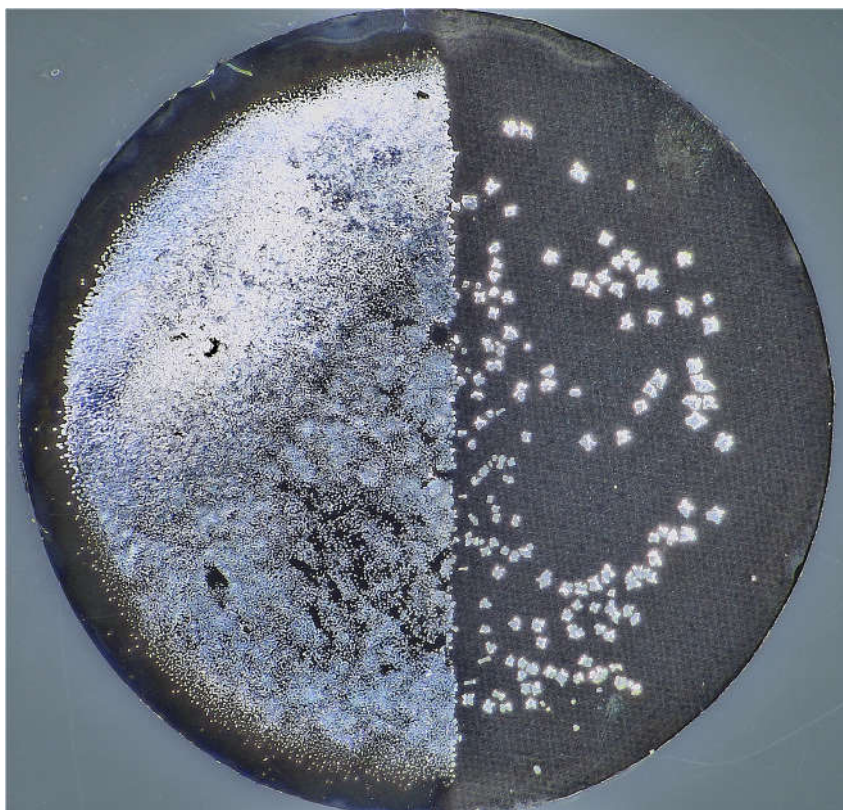

Figure S5. The optical microscope image of the substrate in Figure S4 after deposition of sodium at  $1 \text{ mA cm}^{-2}$  for  $0.4 \text{ mAh cm}^{-2}$ .

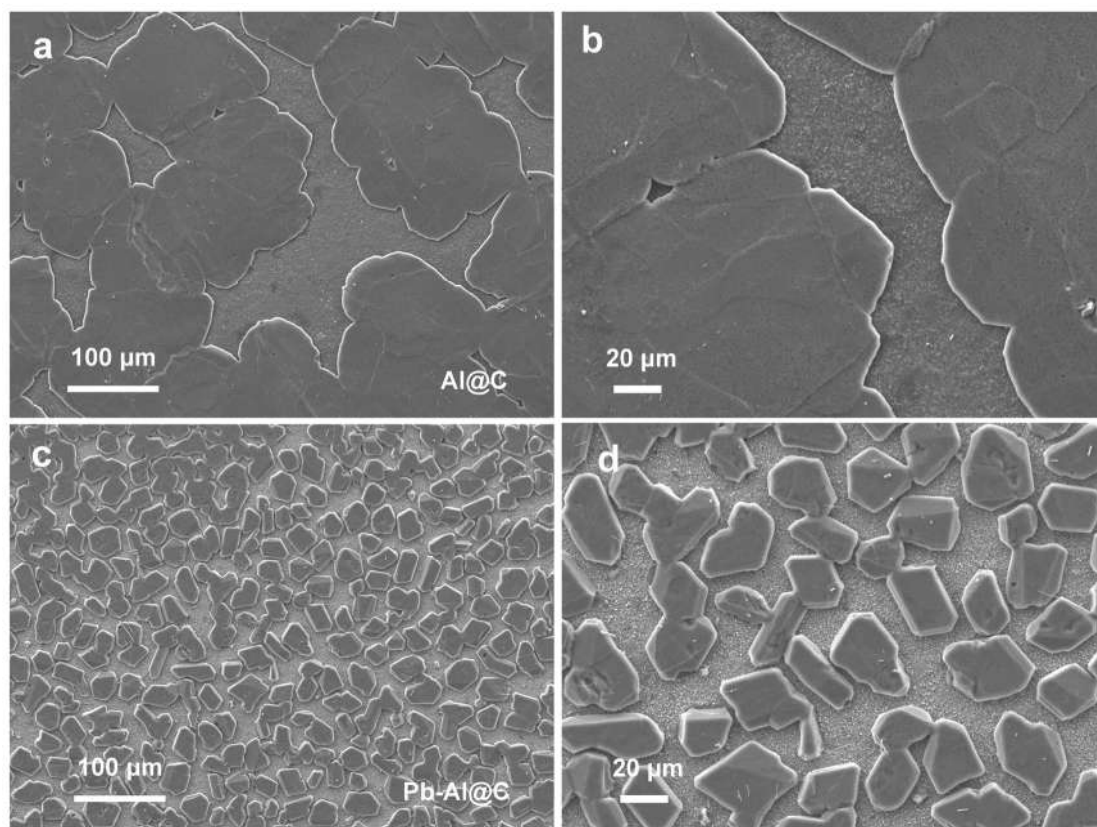

Figure S6. SEM images of sodium deposition on (a-b) Al@C foil and (c-d) Pb-Al@C at  $1 \text{ mA cm}^{-2}$  for  $0.5 \text{ mAh cm}^{-2}$ .

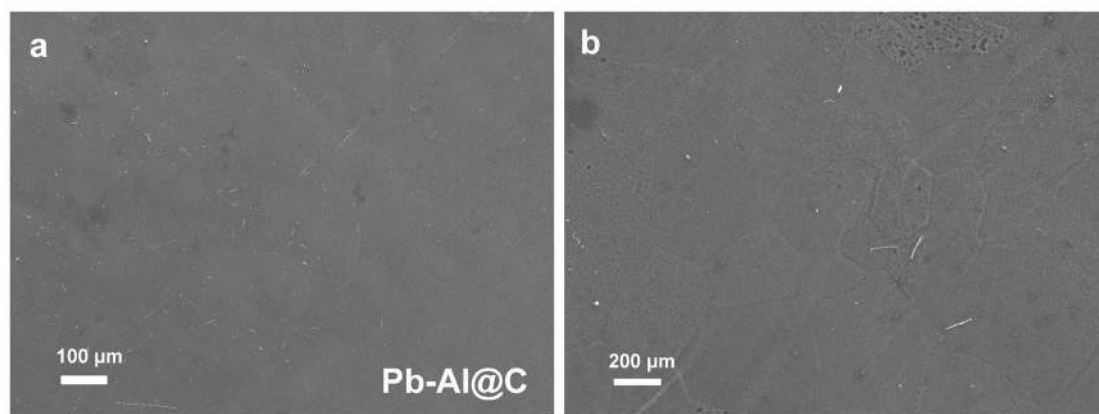

Figure S7. SEM images of sodium deposition on Pb-Al@C at  $1 \text{ mA cm}^{-2}$  for  $2 \text{ mAh cm}^{-2}$ .

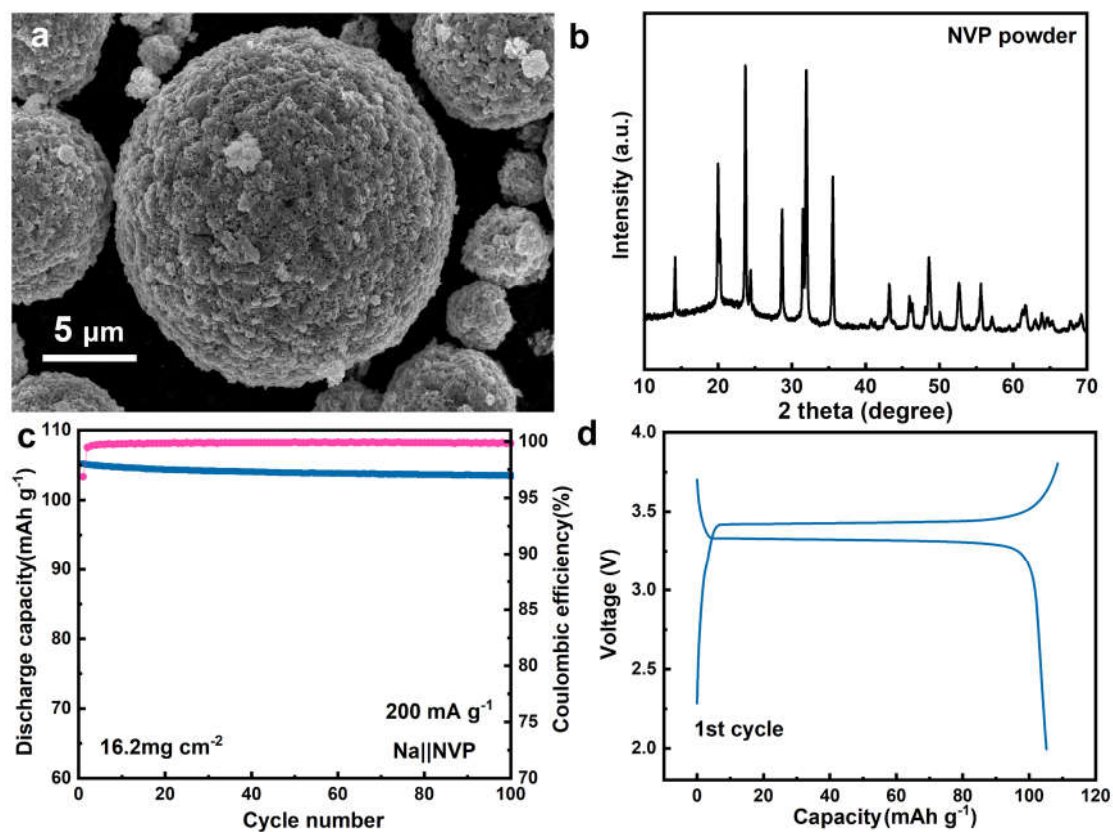

Figure S8. (a) SEM image and (b) XRD pattern of NVP cathode, (c) the cyclic performance and (d) the corresponding initial capacity-voltage curve of the Na||NVP cell.

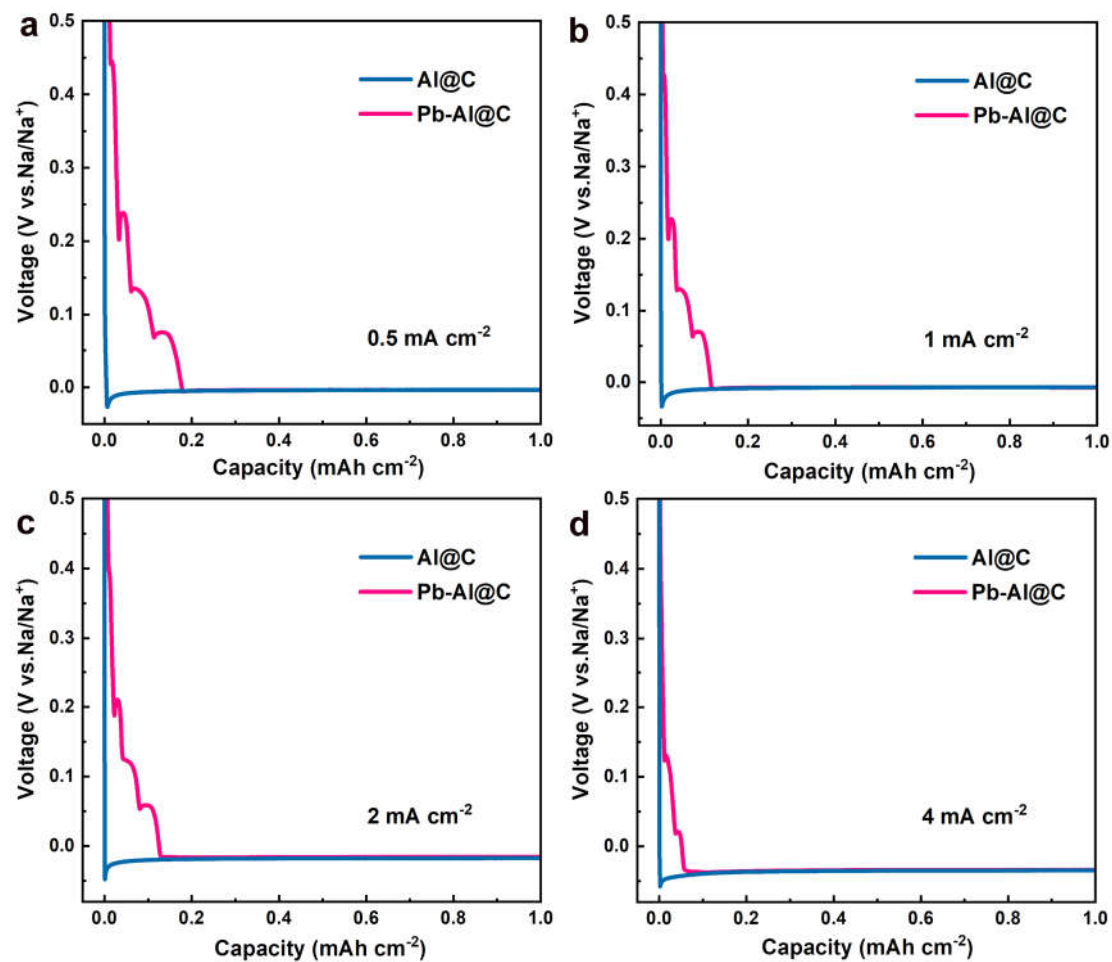

Figure S9. The initial capacity-voltage curves of Na||Al@C and Na||Pb-Al@C half-cells at different current density.

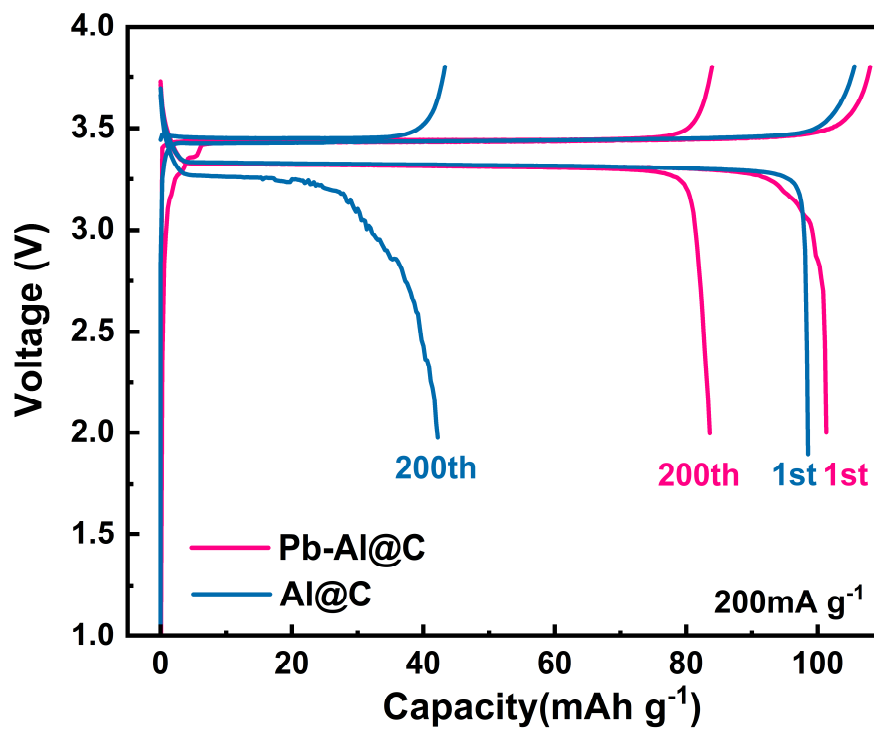

Figure S10. The capacity-voltage curves of Al@C||NVP cell and Pb-Al@C||NVP cell at 200 mA g<sup>-1</sup> current density.

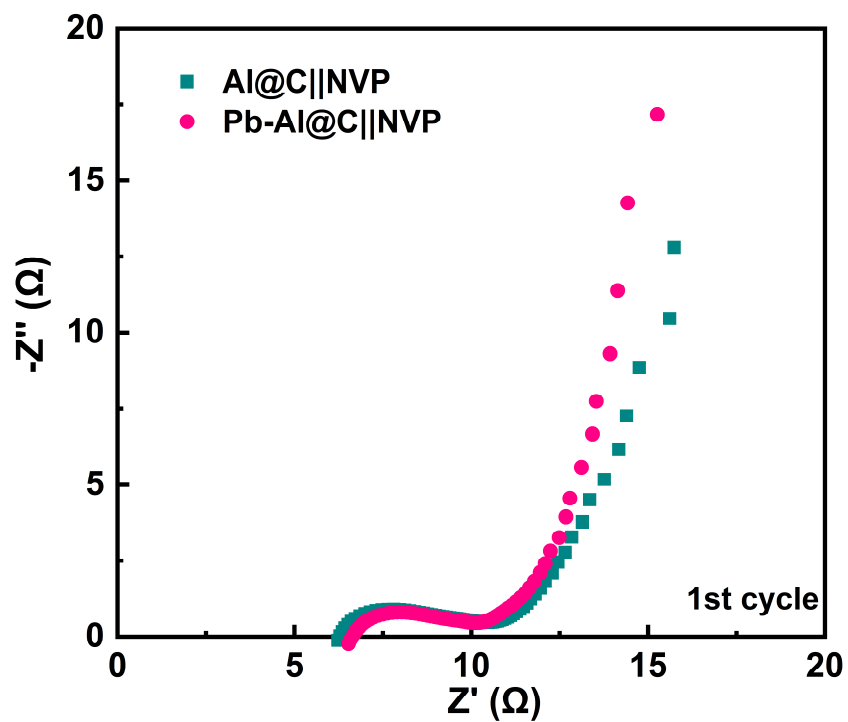

Figure S11. The EIS of Al@C||NVP and Pb-Al@C||NVP cells in the fully charged state for the first cycle.



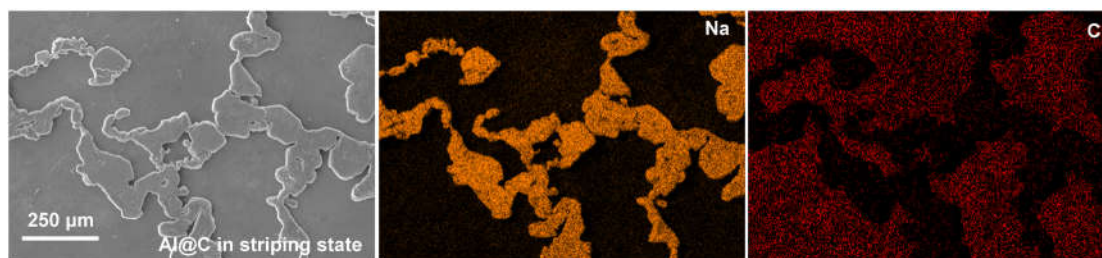

Figure S12. The anode-side SEM image and the corresponding EDS mappings of Al@C||NVP cell after 100th cycle at  $100 \text{ mA g}^{-1}$  in a fully discharged state.

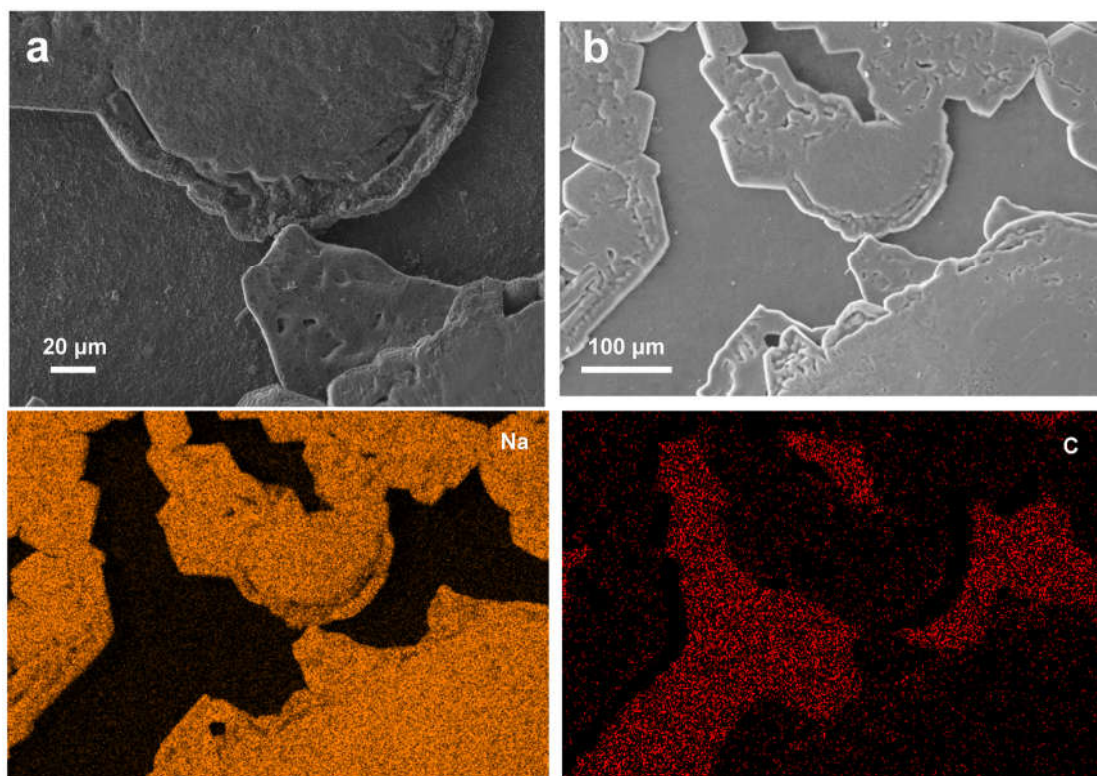

Figure S13. The anode-side SEM images and the corresponding EDS mappings of Al@C||NVP cell after 100th cycle at 100 mA g<sup>-1</sup> in a fully charged state.

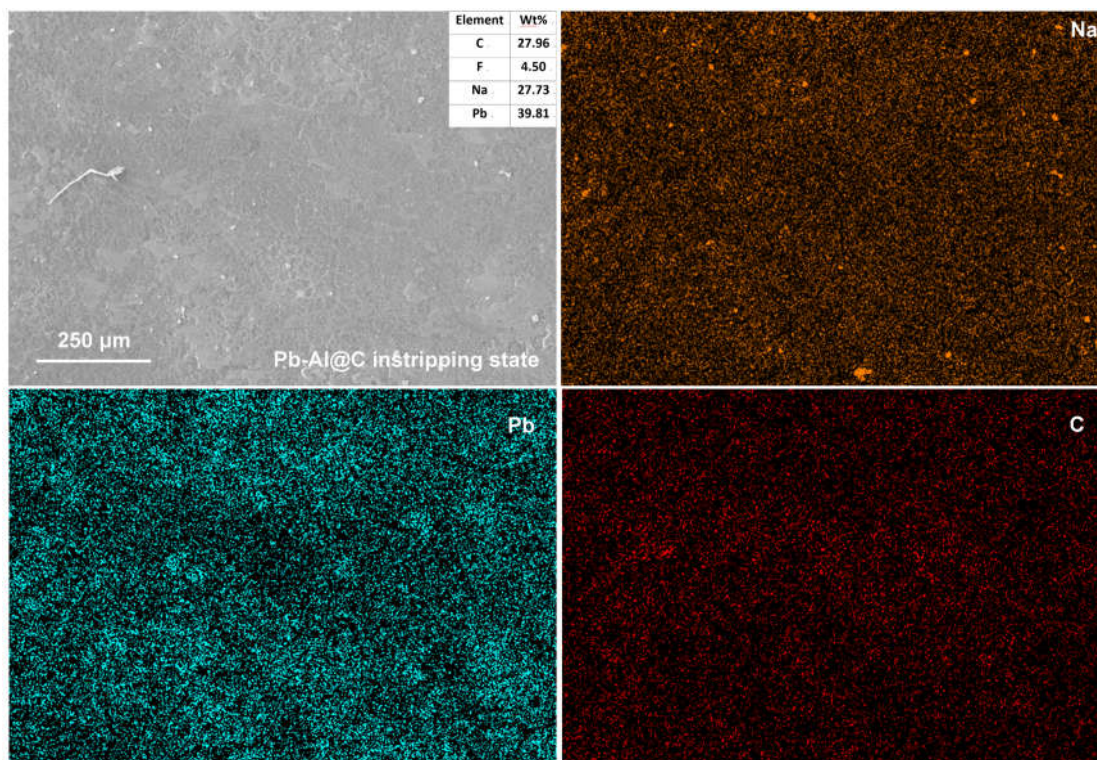

Figure S14. The anode-side SEM image and the corresponding EDS mappings of Pb-Al@C||NVP cell after 100th cycle at 100 mA g<sup>-1</sup> in a fully discharged state.

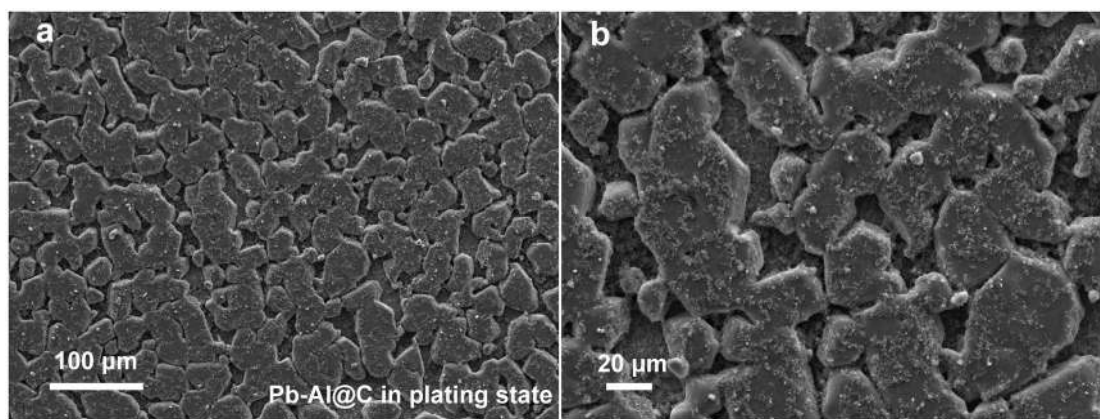

Figure S15. The anode-side SEM images of Pb-Al@C||NVP cell after 100th cycle at  $100 \text{ mA g}^{-1}$  in a fully charged state.

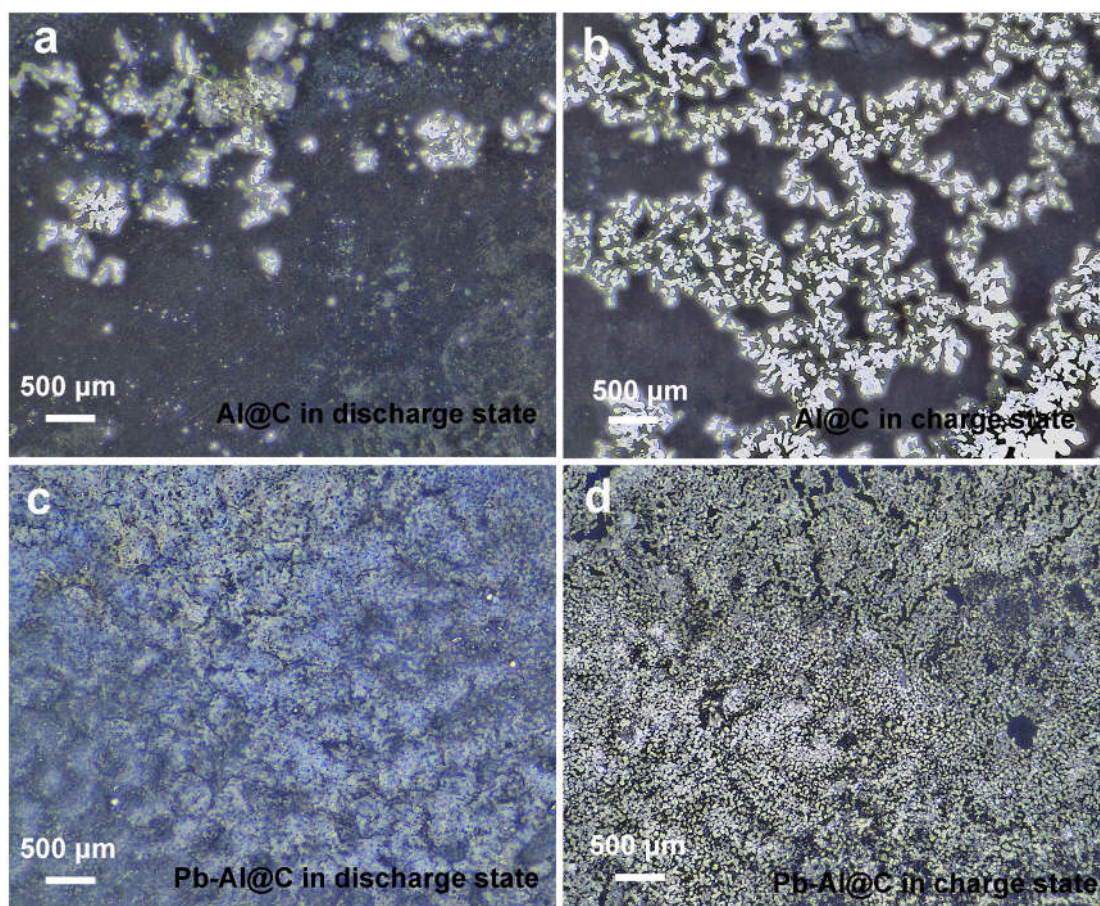

Figure S16. The anode-side optical microscope images of Al@C||NVP cells after 100th cycle at  $100 \text{ mA g}^{-1}$  in a (a) fully discharged state and (b) fully charged state, the anode-side optical microscope images of Pb-Al@C||NVP cells after 100th cycle at  $100 \text{ mA g}^{-1}$  in a (c) fully discharged state and (d) fully charged state.

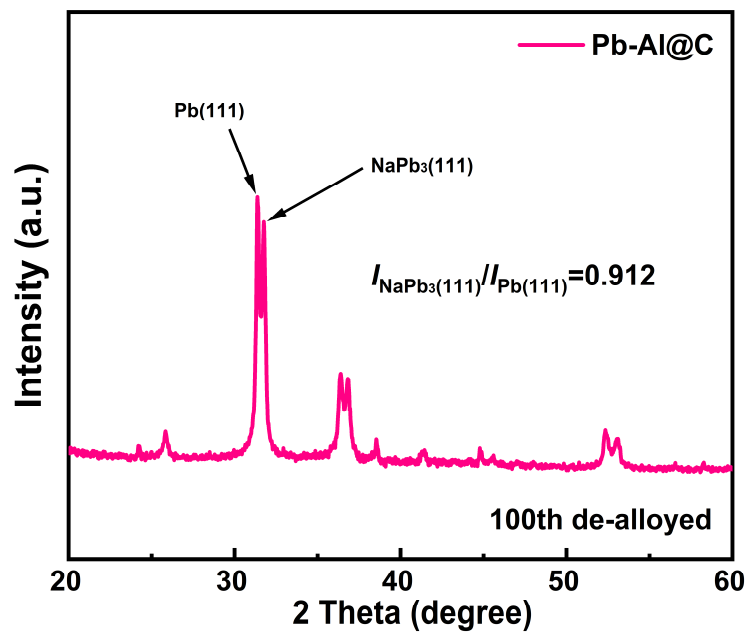

Figure S17. XRD patterns of de-alloyed Pb-Al@C substrates after 100<sup>th</sup> cycle (half-cell charged to 0.5 V).

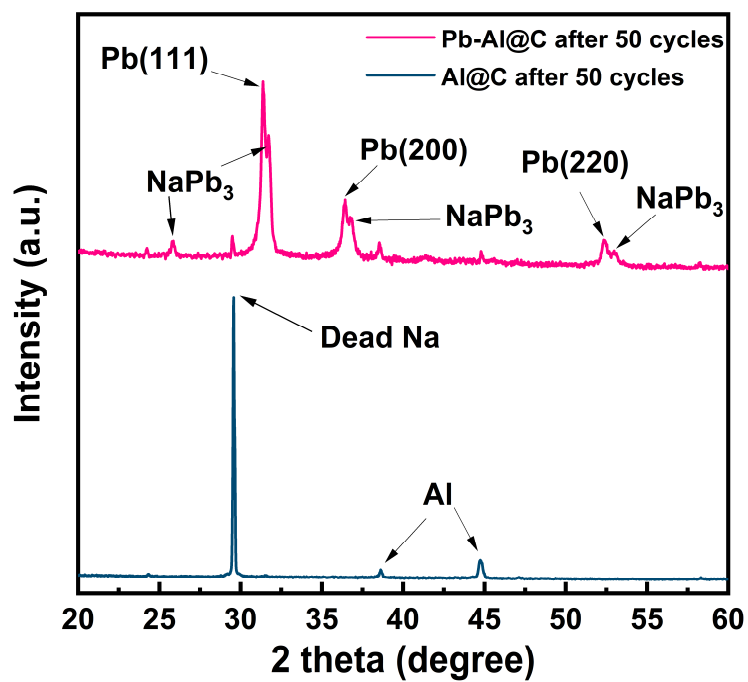

Figure S18. The anode-side XRD patterns of Al@C||NVP and Pb-Al@C||NVP cells after 100th cycle at 100 mA g<sup>-1</sup> in a fully discharged state.

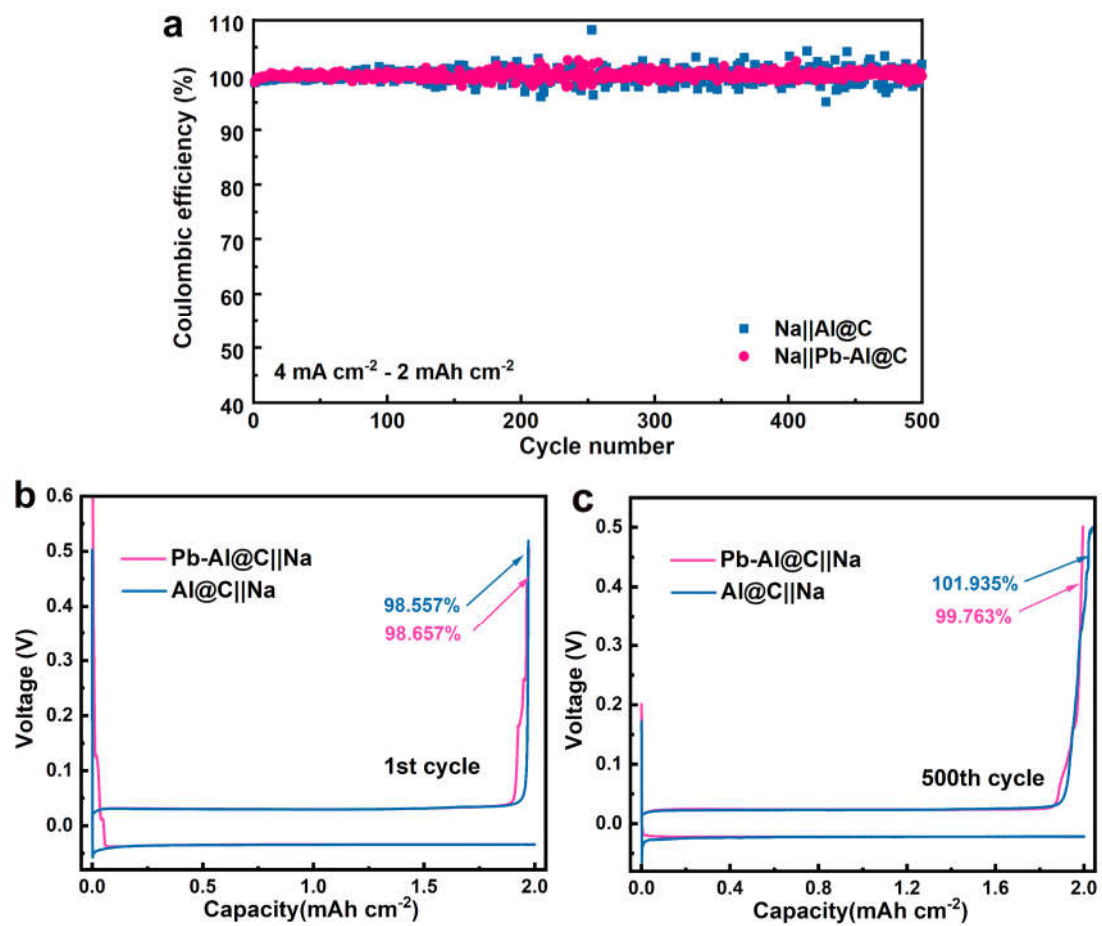

Figure S19. Coulombic efficiency of half-cells at different cycles  $4 \text{ mA cm}^{-2}$  for  $2 \text{ mAh cm}^{-2}$ .



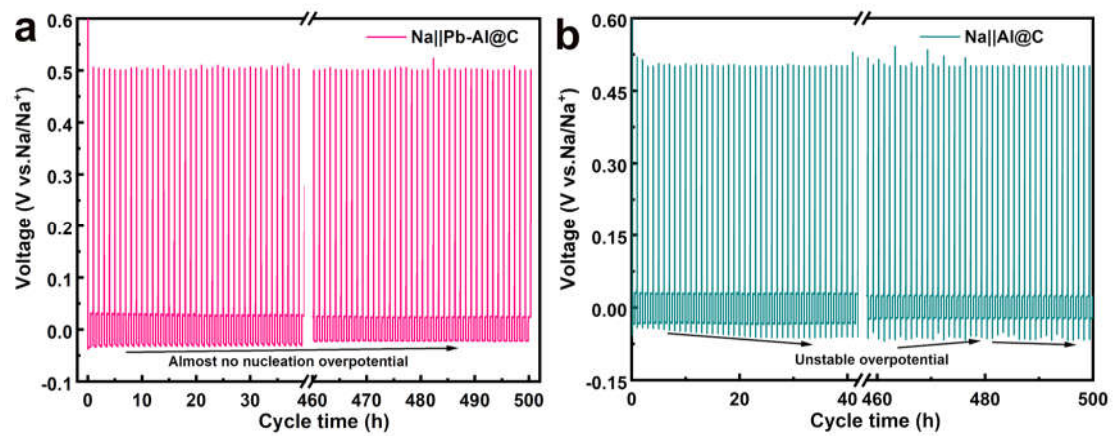

Figure S20. Time-voltage curves of Na||Pb-Al@C and Na||Al@C half-cells at 4 mA cm<sup>-2</sup> for 2mAh cm<sup>-2</sup>.

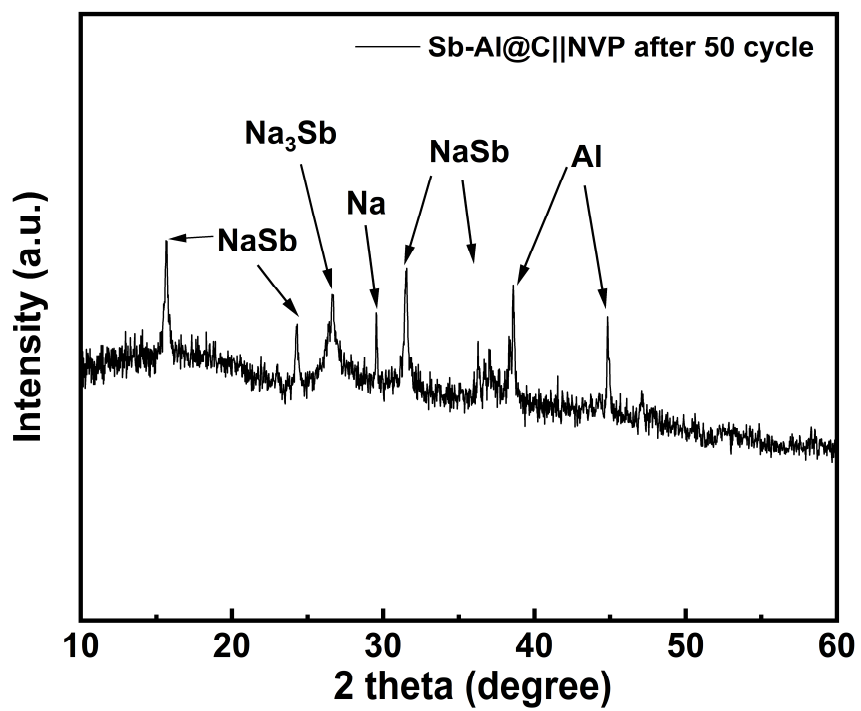

Figure S21. The anode-side XRD pattern of Sb-Al@C||NVP cell after 100th cycle at 100 mA g<sup>-1</sup> in a fully discharged state.

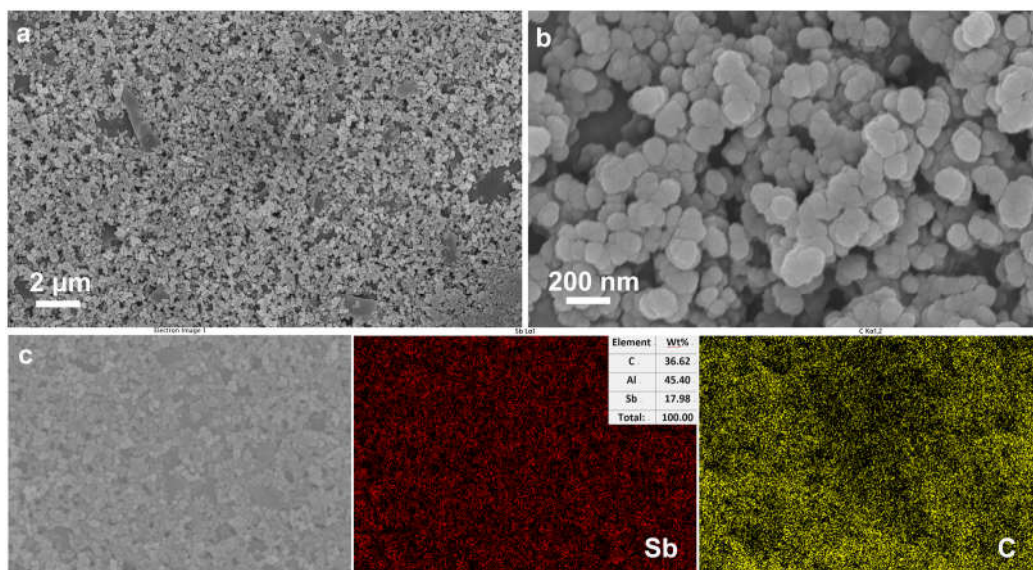

Figure S22. SEM images and corresponding EDS mappings of Sb-Al@C.

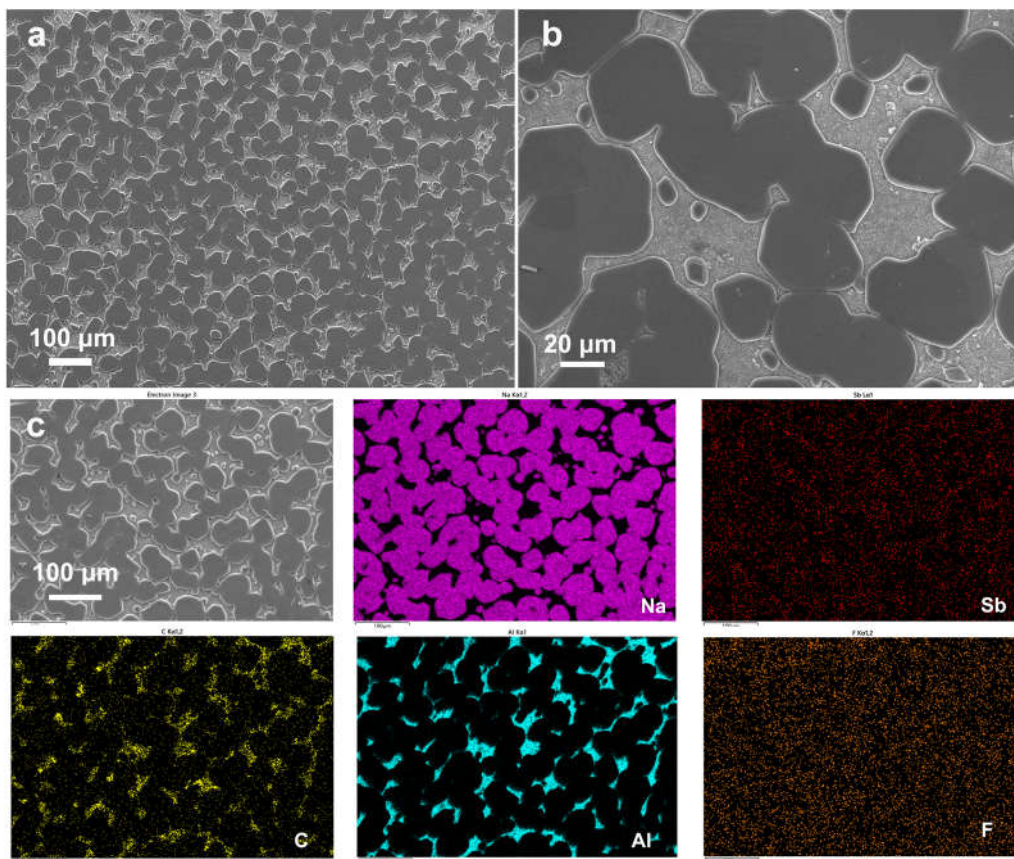

Figure S23. SEM images and corresponding EDS mappings of sodium deposition on Sb-Al@C at  $1 \text{ mA cm}^{-2}$  for  $0.5 \text{ mAh cm}^{-2}$ .

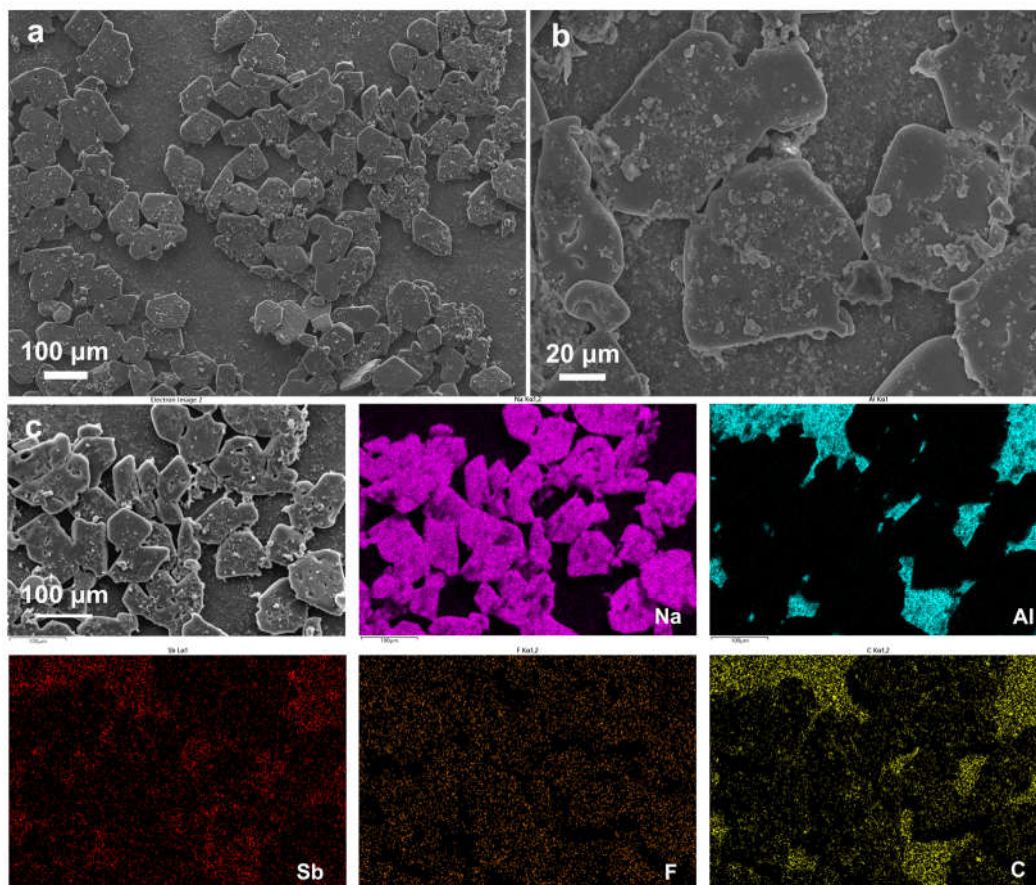

Figure S24. The anode-side SEM images and corresponding EDS mappings of Sb-Al@C||NVP cell after 100<sup>th</sup> cycle at 100 mA g<sup>-1</sup> in a fully charged state.

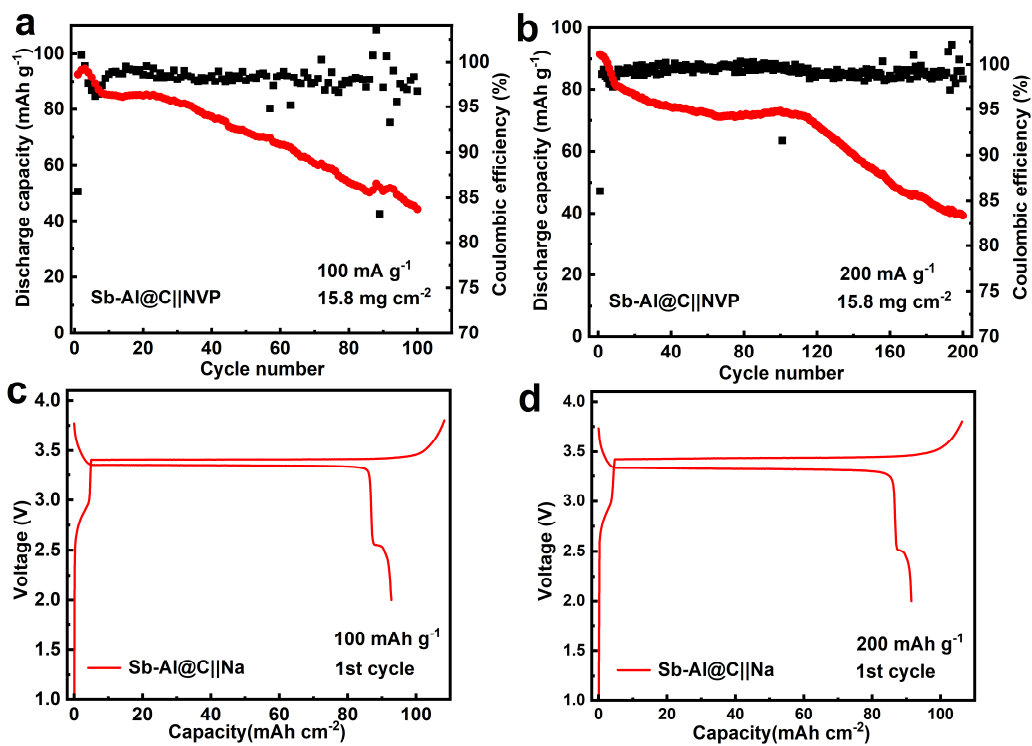

Figure S25. Cyclic performance of Sb-Al@C||NVP cells at (a) 100 mA g<sup>-1</sup> and (b) 200 mA g<sup>-1</sup>.

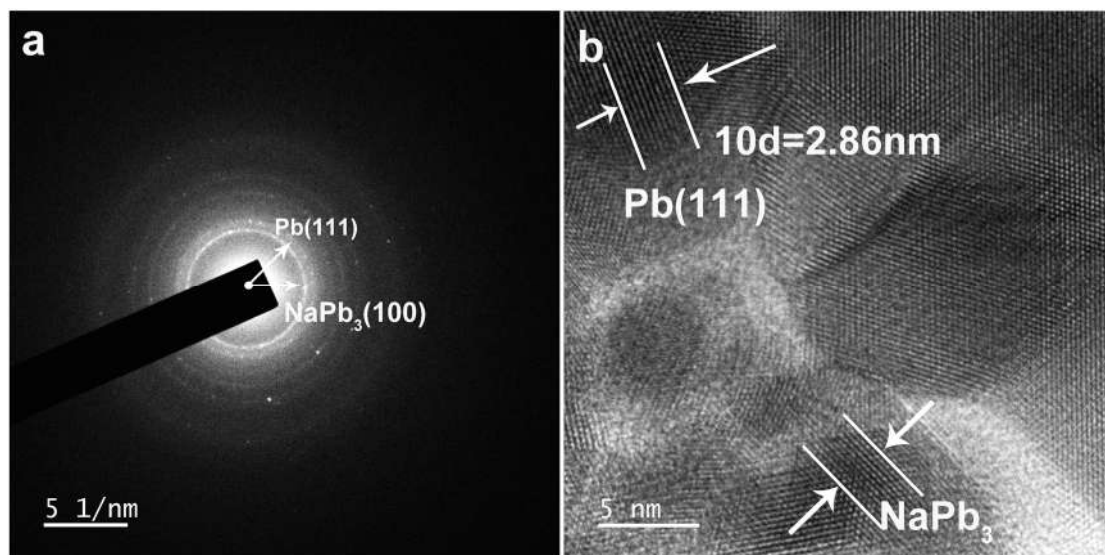

Figure S26. The electron diffraction image and TEM image of Pb particle on molybdenum mesh after 20 cycles of sodium plating/stripping (in the stripped state).

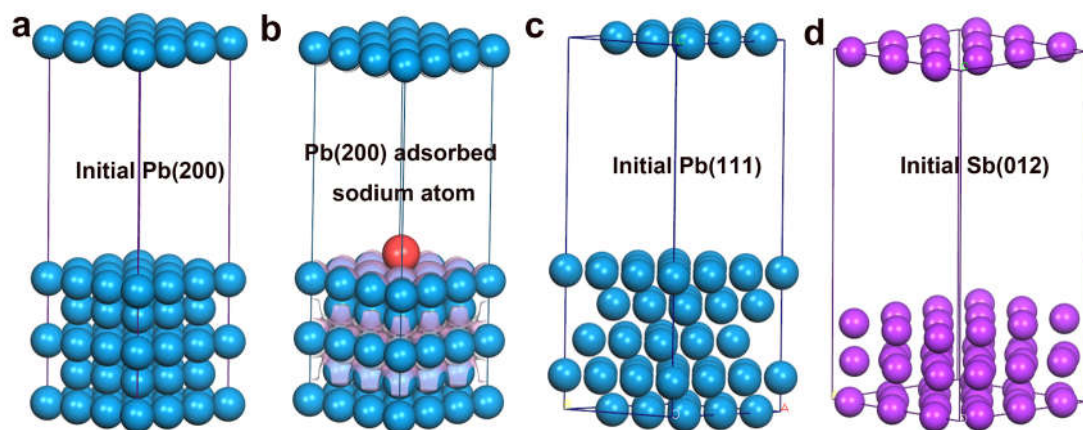

Figure S27. Lattice states of Pb (2 0 0) facets (a) before and (b) after adsorption of sodium atoms. Initial lattice states of the (c) Pb (1 1 1) and (d) Sb (0 1 2) facets.



**Table S1.** The fitted circuit diagram and the corresponding resistance values of the EIS.

Where  $F$  is the frequency at the top of the charge transfer semicircle.

|                                          | $R_e$<br>( $\Omega$ ) | $R_{ct}$<br>( $\Omega$ ) | $F$<br>(Hz) | Equivalent circuit diagrams                                                        |
|------------------------------------------|-----------------------|--------------------------|-------------|------------------------------------------------------------------------------------|
| Al@C  NVP-<br>100 <sup>th</sup> cycle    | 5.11                  | 10.5                     | 794.33      | 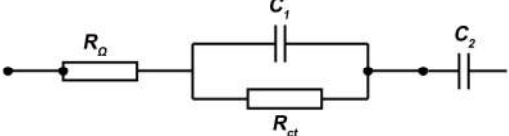 |
| Pb-Al@C  NVP-<br>100 <sup>th</sup> cycle | 5.01                  | 4.8                      | 3981.1      |  |
